# Supplementary material for: Investigating the Relationship of Genotype and Geographical Location on Volatile Composition and Sensory Profile of Celery (Apium graveolens)
Source: MDPI journal article supplement (doi:10.3390/ijms222112016), 2021-11-06
Supplement: s1 [file s1]

**Table S1:** Origin and images of the eight celery samples used in this study and harvested in Ely, United Kingdom and Aguilas, Spain.

| Line | Origin | Harvest UK                                                                          | Harvest Spain                                                                        | Phenotypic Traits                                                             |
|------|--------|-------------------------------------------------------------------------------------|--------------------------------------------------------------------------------------|-------------------------------------------------------------------------------|
| 5    | USA    |    |    | Wide base                                                                     |
| 8    | AUS    |   |   | Compact petioles                                                              |
| 10   | UK     |  |  | Compact, thin petioles                                                        |
| 12   | UK     |  |  | Pink-coloured petioles, present at the base of the plant. Very prominent ribs |

15 USA

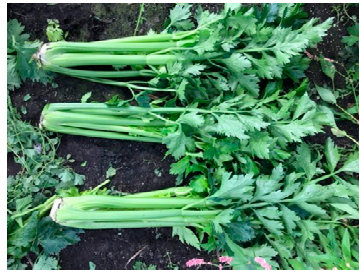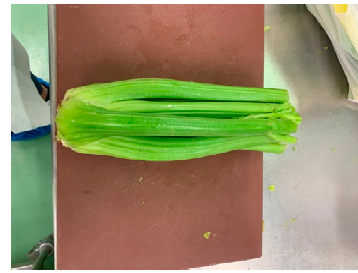

Very dark green  
outer petioles

18 EU

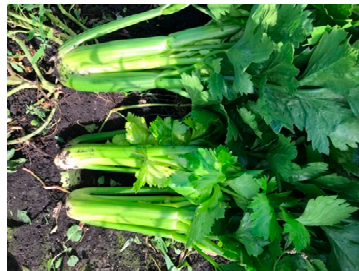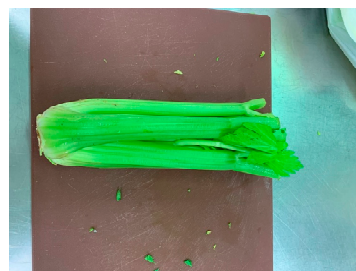

Very short and  
wide petioles

22 USA

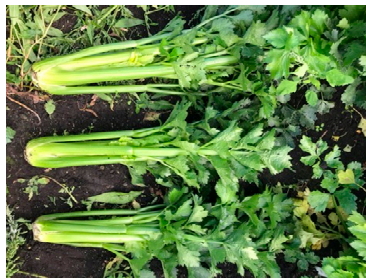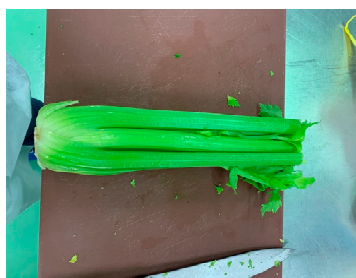

Less prominent  
ribs, compact  
petioles

25 EU

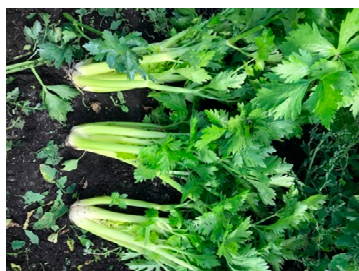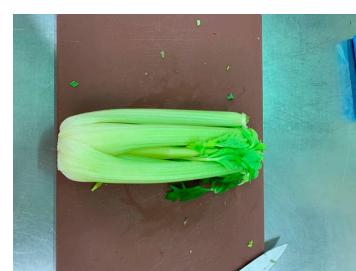

Predominantly  
white genotype  
with very short  
petioles

---
